# Supplementary material for: 8-Oxo-9-Dihydromakomakine Isolated from Aristotelia chilensis Induces Vasodilation in Rat Aorta: Role of the Extracellular Calcium Influx
Source: MDPI journal article supplement (doi:10.3390/molecules23113050), 2018-11-21
Supplement: s1 [file s1]

# Supplementary Materials

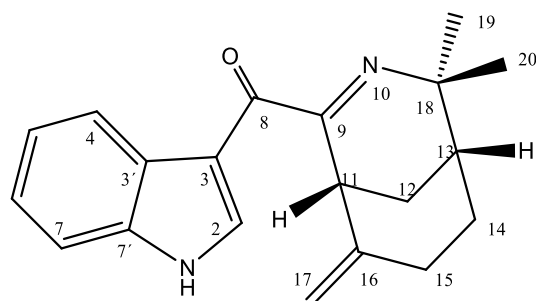

**Figure S1.** Numbered structure of 8-oxo-9-dihydromakomakine

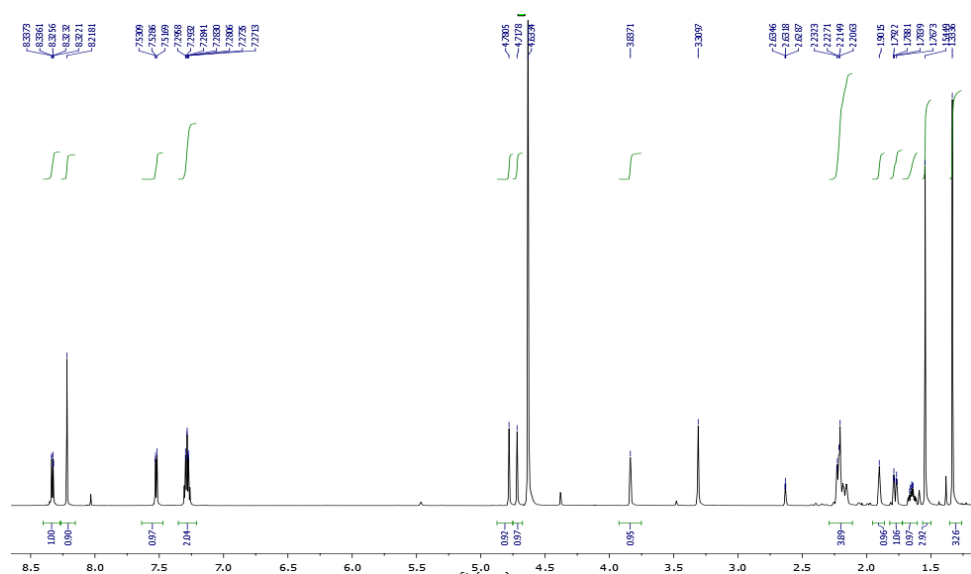

**Figure S2.**  $^1\text{H}$ -NMR (600 MHz,  $\text{CD}_3\text{OD}$ ) spectra of 8-oxo-9-dihydromakomakine

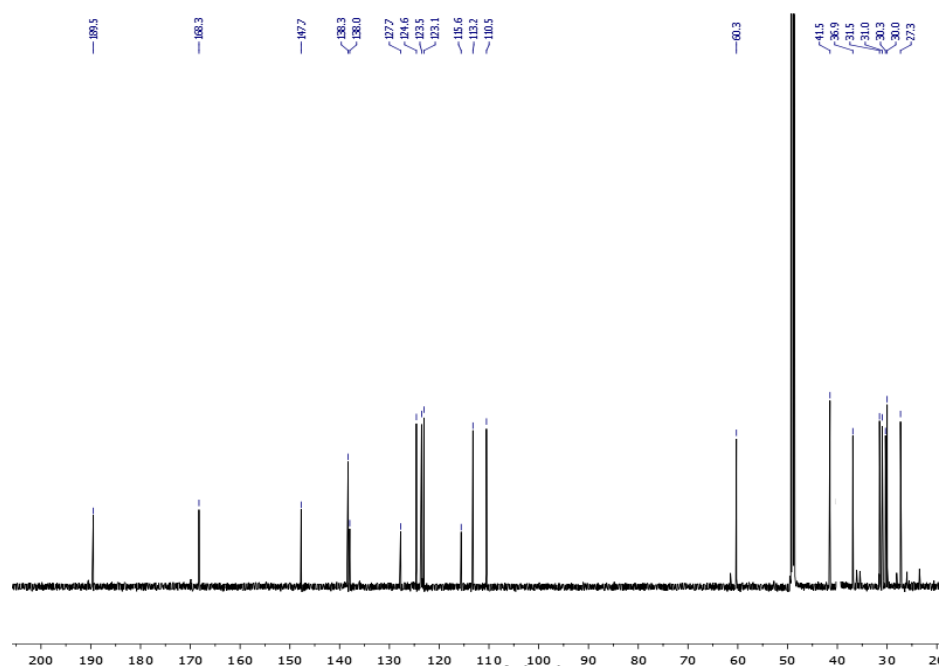

Figure S3.  $^{13}\text{C}$ -NMR (150 MHz,  $\text{CD}_3\text{OD}$ ) spectra of 8-oxo-9-dihydromakomakine

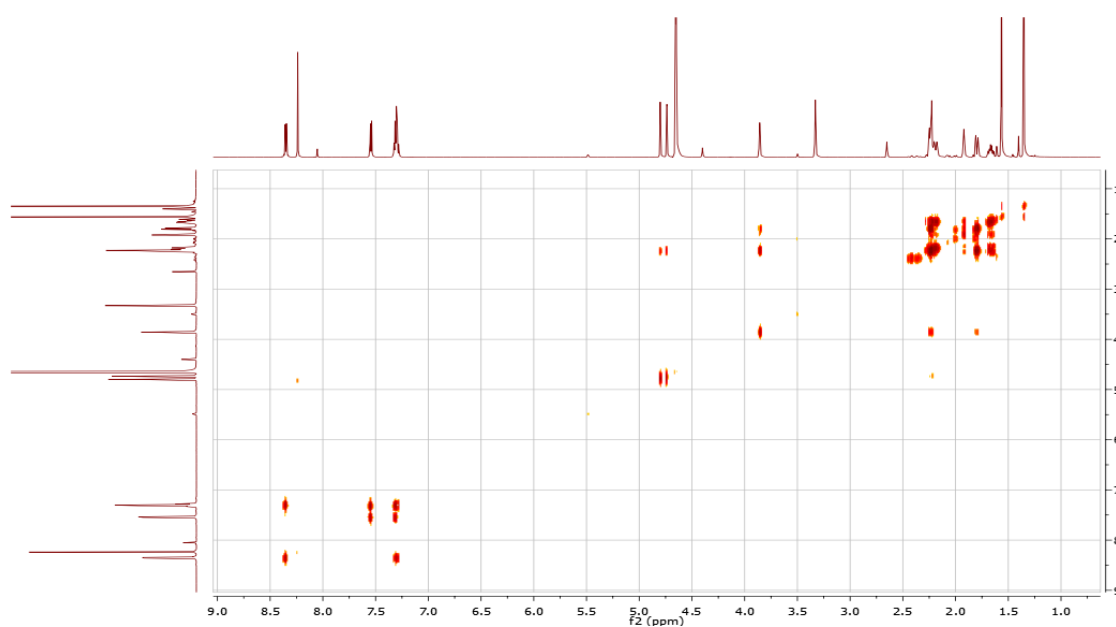

Figure S4. gs-H,H-COSY spectra of 8-oxo-9-dihydromakomakine in  $\text{CD}_3\text{OD}$

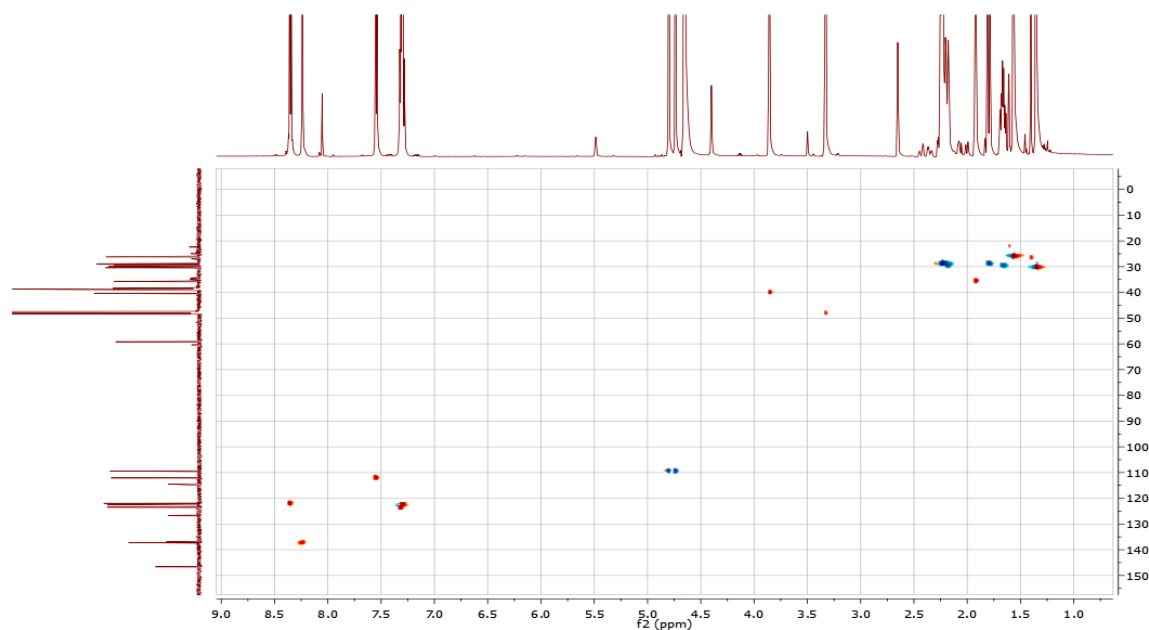

Figure S5. edited HSQC spectra of 8-oxo-9-dihydromakomakine in CD<sub>3</sub>OD

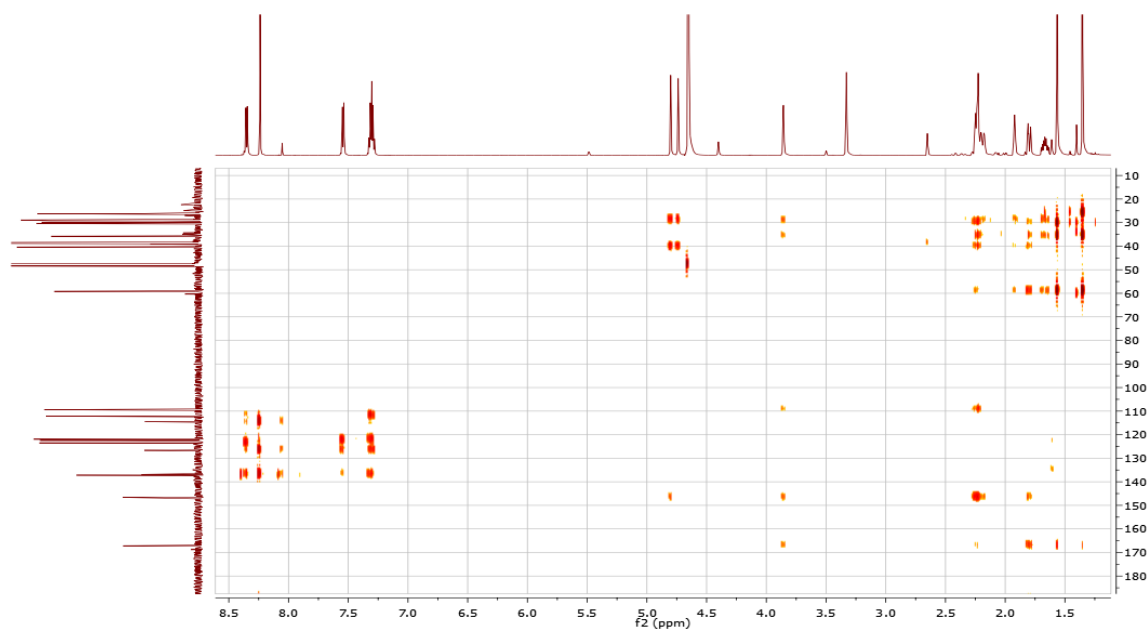

Figure S6. gs-HMBC spectra of 8-oxo-9-dihydromakomakine in CD<sub>3</sub>OD
